# Supplementary material for: Development and Functional Characterization of a Versatile Radio-/Immunotheranostic Tool for Prostate Cancer Management
Source: MDPI journal article supplement (doi:10.3390/cancers14081996), 2022-04-14
Supplement: s1 [file s1]

# Development and Functional Characterization of a Versatile Radio-/Immunotheranostic Tool for Prostate Cancer Management

Claudia Arndt <sup>1,2</sup>, Ralf Bergmann <sup>1,3</sup>, Franziska Striese <sup>1</sup>, Keresztély Merkel <sup>3,4</sup>, Domokos Máthé <sup>3,5</sup>, Liliana R. Loureiro <sup>1</sup>, Nicola Mitwasi <sup>1</sup>, Alexandra Kegler <sup>1</sup>, Frederick Fasslrunner <sup>2,6</sup>, Karla Elizabeth González Soto <sup>1</sup>, Christin Neuber <sup>1</sup>, Nicole Berndt <sup>1</sup>, Noemi Kovács <sup>3</sup>, David Szöllősi <sup>3</sup>, Nikolett Hegedűs <sup>3</sup>, Gyula Tóth <sup>7</sup>, Jan-Philipp Emmermann <sup>3</sup>, Kuzhuvelil B. Harikumar <sup>8</sup>, Tibor Kovacs <sup>9</sup>, Michael Bachmann <sup>1,10,11,12,\*</sup> and Anja Feldmann <sup>1</sup>

Helmholtz-Zentrum Dresden-Rossendorf, Institute of Radiopharmaceutical Cancer Research, D-01328 Dresden, Germany; c.arndt@hzdr.de (C.A.); r.bergmann@hzdr.de (R.B.); f.striese@rotop-pharmaka.de (F.S.); l.loureiro@hzdr.de (L.R.L.); n.mitwasi@hzdr.de (N.M.); a.kegler@hzdr.de (A.K.); k.gonzalez@hzdr.de (K.E.G.S.); c.neuber@hzdr.de (C.N.); n.berndt@hzdr.de (N.B.); a.feldmann@hzdr.de (A.F.)

<sup>2</sup> Mildred Scheel Early Career Center, Faculty of Medicine Carl Gustav Carus, TU Dresden, D-01328 Dresden, Germany; frederick.fasslrunner@uniklinikum-dresden.de

<sup>3</sup> Department of Biophysics and Radiation Biology, Faculty of Medicine, Semmelweis University, Tűzoltó u. 37-47, H-1094 Budapest, Hungary; merkel.keresztely@phd.semmelweis-univ.hu (K.M.); domokos.mathe@hceimm.eu (D.M.); noemi.kovacs@hceimm.eu (N.K.); szollosi.david@med.semmelweis-uni.hu (D.S.); hegedus.nikolett@med.semmelweis-univ.hu (N.H.); jan.emmermann@stud.semmelweis.hu (J.-P.E.)

<sup>4</sup> University No. 1 Clinic for Surgery, Faculty of Medicine, Semmelweis University, H-1094 Budapest, Hungary

<sup>5</sup> Hungarian Centre of Excellence for Molecular Medicine, In Vivo Imaging Advanced Core Facility, H-6723 Szeged, Hungary

<sup>6</sup> Medical Clinic and Polyclinic I, Medical Faculty, University Hospital Carl Gustav Carus, Technical University Dresden, D-01307 Dresden, Germany

<sup>7</sup> Department: Cyclotron & Radiochemistry, Pozitron Ltd., H-1094 Budapest, Hungary; gyula.toth@pet.hu

<sup>8</sup> Cancer Research Program, Rajiv Gandhi Centre for Biotechnology (RGCB), Thiruvananthapuram 695 014, Kerala, India; harikumar@rgcb.res.in

<sup>9</sup> Institute of Radiochemistry and Radioecology, University of Pannonia, H-8200 Veszprem, Hungary; kt@almos.uni-pannon.hu

<sup>10</sup> National Center for Tumor Diseases (NCT), D-01307 Dresden, Germany; German Cancer Research Center (DKFZ), D-69120 Heidelberg, Germany; Faculty of Medicine and University Hospital Carl Gustav Carus, Technische Universität Dresden, D-01307 Dresden, Germany; Helmholtz-Zentrum Dresden-Rossendorf (HZDR), D-01328 Dresden, Germany

<sup>11</sup> German Cancer Consortium (DKTK), Partner Site Dresden and German Cancer Research Center (DKFZ), D-69120 Heidelberg, Germany

<sup>12</sup> Tumor Immunology, University Cancer Center (UCC), University Hospital Carl Gustav Carus, Technical University Dresden, D-01307 Dresden, Germany

\* Correspondence: m.bachmann@hzdr.de

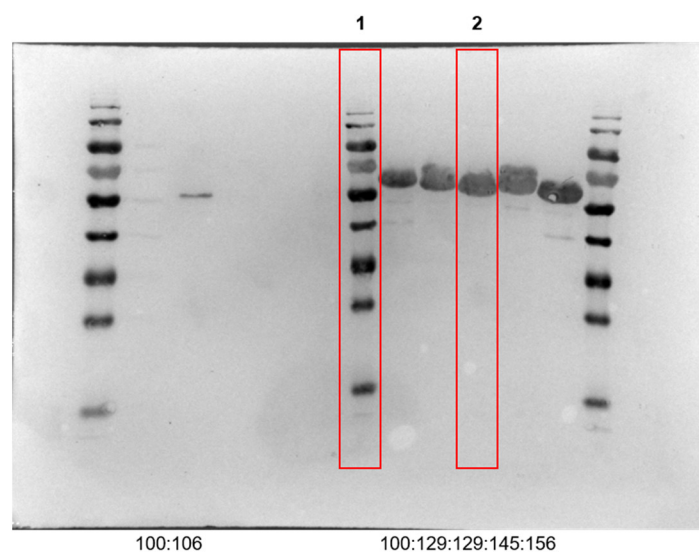

**Figure S1.** Uncropped Western Blot image. Uncropped Western Blot image corresponding to the two lanes (red boxes, lane 1 and 2) shown in Figure 2E of the manuscript. Lane 1: molecular weight marker; Lane 2: anti-PSCA IgG4-TM elution fraction. All the other lanes include molecules not related to the work developed in the submitted manuscript.

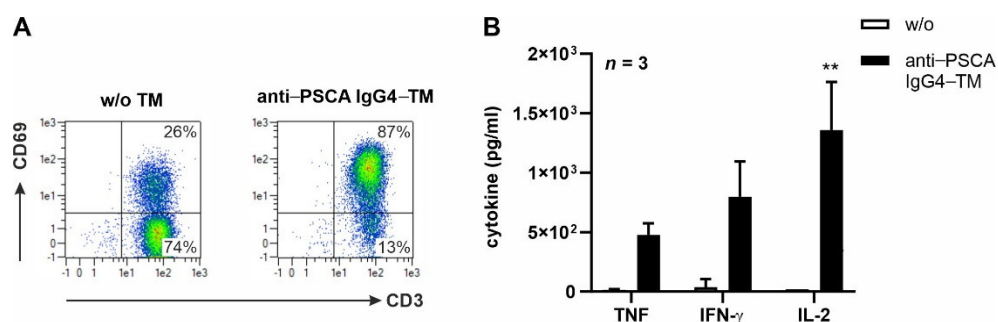

**Figure S2.** Redirection of UniCAR T cells to LNCaP-PSCA cells via the novel anti-PSCA IgG4-TM. UniCAR T cells were incubated with LNCaP-PSCA cells at an E:T ratio of 5:1 in the presence or absence of 5 nM TM. After 24 hours, **(A)** CD69 expression on UniCAR T cells and **(B)** secretion of TNF, IFN-γ and IL-2 were analyzed via flow cytometry or ELISA, respectively. **(B)** Summarized data of three different T cell donors are shown as mean ± SEM (\*\*  $p < 0.01$ , compared to samples w/o the anti-PSCA IgG4-TM; two-way ANOVA with post-hoc Šídák's multiple comparisons test).

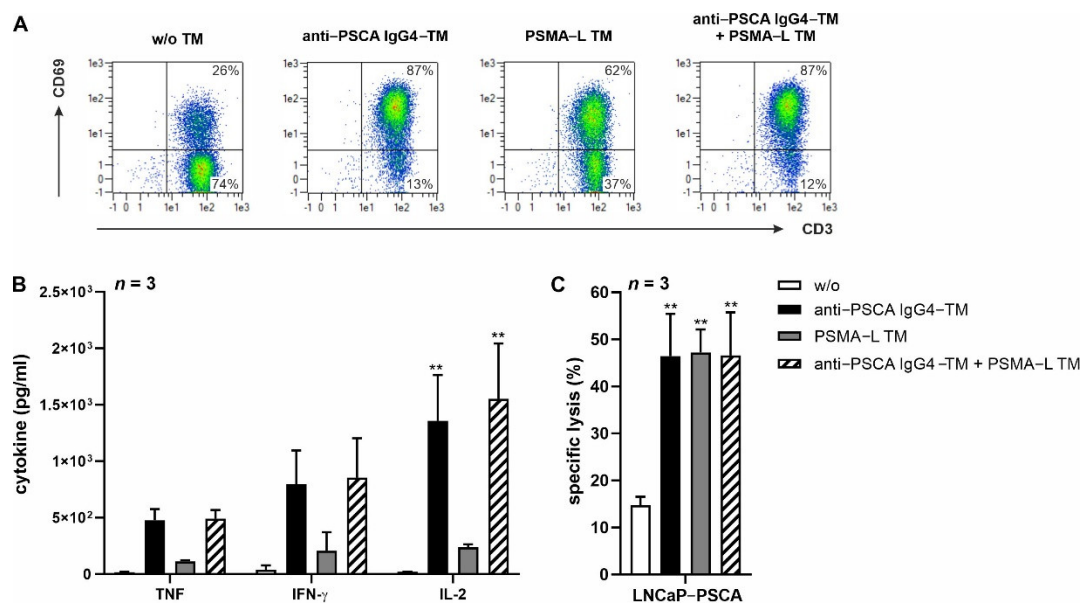

**Figure S3.** Dual-targeting of LNCaP-PSCA cells using the novel anti-PSCA IgG4-TM and the PSMA-L TM. UniCAR T cells were incubated with LNCaP-PSCA cells at an E:T ratio of 5:1 in the presence or absence of one or both TMs (5 nM each). After 24 hours, **(A)** CD69 expression on UniCAR T cells, **(B)** secretion of TNF, IFN- $\gamma$  and IL-2, and **(C)** tumor cell killing were analyzed via flow cytometry, ELISA or standard chromium release assay, respectively. **(B,C)** Summarized data of three different T cell donors are shown as mean  $\pm$  SEM (\*\*  $p < 0.01$ , compared to samples w/o TM; two-way ANOVA with post-hoc Šidák's multiple comparisons test).
